# Supplementary material for: Syntaxin1A overexpression and pain insensitivity in individuals with 7q11.23 duplication syndrome
Source: PubMed Central journal article supplement (PMC10967379; doi:10.1172/jci.insight.176147), 2024-02-22
Supplement: jciinsight-9-176147-s216.pdf [file jciinsight-9-176147-s216.pdf]

1 **Supplementary Materials: Syntaxin1A overexpression and pain**  
2 **insensitivity in individuals with 7q11.23 duplication syndrome**

3  
4 Michael J. Iadarola<sup>1\*</sup>, Matthew R. Sapio<sup>1</sup>, Amelia J. Loydpierson<sup>1</sup>, Carolyn B.  
5 Mervis<sup>2</sup>, Jill C. Fehrenbacher<sup>3</sup>, Michael R. Vasko<sup>3</sup>, Dragan Maric<sup>4</sup>, Daniel P.  
6 Eisenberg<sup>5</sup>, Tiffany A. Nash<sup>5</sup>, J. Shane Kippenhan<sup>5</sup>, Madeline H. Garvey<sup>5</sup>,  
7 Andrew J. Mannes<sup>1</sup>, Michael D. Gregory<sup>5†</sup>, Karen F. Berman<sup>5†</sup>  
8

9 **Author Affiliations**

- 10 1. Department of Perioperative Medicine, Clinical Center, National Institutes  
11 of Health, Bethesda, MD 20892  
12 2. Neurodevelopmental Sciences Laboratory, Department of Psychological  
13 and Brain Sciences, University of Louisville, Louisville, KY, 40292  
14 3. Department of Pharmacology & Toxicology, Indiana University School of  
15 Medicine, Indianapolis, IN 46202  
16 4. Flow and Imaging Cytometry Core Facility, National Institute of  
17 Neurological Disorders and Stroke, National Institutes of Health,  
18 Bethesda, MD 20892  
19 5. Clinical and Translational Neuroscience Branch, National Institute of  
20 Mental Health, National Institutes of Health, Bethesda, MD 20892  
21

22 †These authors contributed equally

23  
24 \*To whom correspondence should be addressed:

25 Department of Perioperative Medicine,  
26 Building 10 Room 3D56, Clinical Center  
27 National Institutes of Health,  
28 10 Center Drive  
29 Bethesda, MD 20892  
30 e-mail [Michael.iadarola@nih.gov](mailto:Michael.iadarola@nih.gov)

31 **Supplementary Materials and Methods.**

32 ***Human DRG Recovery and Processing***

33 Lumbar DRGs were obtained from organ donors (N=3) within 2 hours of aortic  
34 cross clamp (AnaBios Corp, San Diego, CA) or at “stat” autopsy at the  
35 Laboratory of Pathology, NCI, NIH. The L4 or L5 ganglia, bilaterally, and lumbar  
36 spinal cord were recovered from these donors after opening the vertebral canal.  
37 Tissue was frozen on dry ice and stored frozen at -80°C until used for  
38 immunocytochemistry or *in situ* hybridization. One ganglion from the respective  
39 vertebral segment was immersion fixed in 4% neutral buffered formalin for 18 to  
40 24 hours and embedded in a paraffin block. Six  $\mu\text{m}$  sections were cut and  
41 mounted by HistoServ Inc (Germantown, MD) using RNase free procedures.  
42 Slide mounted sections were stored at -80°C. RNA sequencing data from human  
43 DRG was reanalyzed from a previous study (77, 78).

44

45 ***Immunohistochemical staining for CGRP in human DRG and spinal cord***

46 For immunohistochemistry, 6  $\mu\text{m}$  sections were deparaffinized and hydrated  
47 through graded alcohols to distilled water, followed by antigen retrieval using pH  
48 6 citrate buffer at 70°C for 40 minutes. Primary anti-CGRP antibody was from  
49 Peninsula Laboratories (T-4239). Sections were then blocked with hydrogen  
50 peroxide and a blocking serum and washed in distilled water. Next, the slides  
51 were successively incubated with intermediate wash steps using Tris-buffered  
52 saline with 0.1% Tween-20. The first incubation was with a rabbit primary  
53 antibody (CGRP, Peninsula Laboratories, Catalogue#T-4239), followed by a  
54 biotinylated secondary antibody (Rb Ig Vector Laboratories, Newark, CA#BA-  
55 1000) and then HRP-conjugated Streptavidin (Strep. HRP Vector Laboratories  
56 #SA-5004). Finally, the slides were developed using Fuchsin Red (Dako  
57 #K0625; Agilent, Santa Clara, CA) and counterstained with Hematoxylin. All  
58 incubations were carried out at room temperature.

59

60

61 ***In situ hybridization***

62 The RNA-Scope method (Advanced Cell Diagnostics, Newark, CA) was used for  
63 *in situ* hybridization analysis of *STX1A*, *TRPV1*, *TAC1* (substance P precursor),  
64 and *LIMK1*. RNAScope® Multiplex Fluorescent assay v2 (Advanced Cell  
65 Diagnostics) with Tyramide Signal Amplification (Opal™ Reagent Systems;  
66 Perkin Elmer, Waltham MA) were used for multiplex *in situ* hybridization as  
67 described previously (69). Staining protocols followed manufacturers'  
68 recommendations. The following RNAScope® Probes were used. (catalogue  
69 numbers as follows: *STX1A*, 543391; *TRPV1*, 415381; *TAC1*, 310711; *LIMK1*,  
70 560051). Image capture from the stained sections was performed with an Axio  
71 Imager.Z2 slide scanning fluorescence microscope (Zeiss, Oberkochen,  
72 Germany) equipped with a 20X/0.8 Plan-Apochromat (Phase-2) non-immersion  
73 objective (Zeiss), a high-resolution ORCA-Flash4.0 sCMOS digital camera  
74 (Hamamatsu), a 200W X-Cite 200DC broad band lamp source (Excelitas  
75 Technologies, Waltham MA) and 5 customized filter sets (Semrock, Rochester  
76 NY) optimized to detect the following fluorophores: DAPI, Opal520, Opal570,  
77 Opal620, Opal690. Image tiles (600 x 600 μm viewing area) were individually  
78 captured at 0.325 micron/pixel spatial resolution, and the tiles seamlessly  
79 stitched into whole specimen images using the ZEN 2 image acquisition and  
80 analysis software program (Zeiss). Stitched images were overlaid as individual  
81 layers to create multicolored merged composites. To display low magnification  
82 images, signal intensity was substantially enhanced for representative images in  
83 some cases. This enhancement was performed uniformly throughout the whole  
84 section.

85

86 ***Visualization of RNA-Seq data using heatmaps and scatter plots***

87 Hierarchical clustering and heatmap visualizations were performed on expression  
88 values (median RPKM, GTEEx Analysis v6)(29) for all 7q11.23 WS locus genes in  
89 R. Data were scaled in R and clustered according to the ward.D2 method (70)  
90 and visualized with the heatmap.2 function.

91

92 ***Transcriptomic analyses of DRG neuronal subtypes expressing Stx1a***

93 Transcriptomic analyses in Figure 2A and 2B were performed using the data  
94 from Goswami, et al. 2014 to identify enrichment of *Stx1a* in mouse DRG *Trpv1*  
95 lineage and non-lineage neurons (23). Note that there are some developmental  
96 differences between *Trpv1* lineage neurons and adult *Trpv1*+ neurons due to  
97 early expression of TRPV1 during differentiation (5, 79). All genes in the WS  
98 locus were examined using read counts in the mouse. Additional verification was  
99 obtained by analyzing a sorted RNA-Seq dataset also from mouse DRG from  
100 Zheng, et al. 2019 (24). The physiologically characterized categories of DRG  
101 neurons were described in (71, 72).

102

103 ***Lymphoblastoid cell lines and RNA-Seq.***

104 RNA was extracted from lymphocyte cell lines for 23 children with WS, 40  
105 typically developing children, and 13 children with Dup7 and RNA sequencing  
106 was performed at the NIH Intramural Sequencing Center. Stranded Poly-A  
107 selected mRNA libraries were constructed from 1  $\mu$ g total RNA for each sample  
108 using the TruSeq Stranded mRNA Kit (Illumina, San Diego, CA) according to  
109 manufacturer's instructions except where noted. Amplification was performed  
110 using 10 cycles to minimize over-amplified product. Unique dual-indexed  
111 barcode adapters were applied to each library. Libraries were pooled in an  
112 equimolar ratio for sequencing. The pooled libraries were sequenced on an S4  
113 flow cell on a NovaSeq 6000 using version 1.0 chemistry to achieve a minimum  
114 of 49 million 150 base read pairs. The data was processed using RTA version  
115 3.4.4. Alignment of resulting RNASeq fastq files was performed using STAR  
116 version 2.6.1 to the GRCh37 genome build. Aligned reads were further  
117 processed using QoRTs version 1.3.6 and normalized count values of genes of  
118 interest were analyzed using DESeq2 to test for stepwise group differences.

119

120

121 **Cell culture**

122 Dorsal root ganglia (DRG) were dissected from all spinal levels of adult male  
123 (150–175 g) Sprague-Dawley rats (Envigo, Indianapolis, IN) and the cells were  
124 dissociated as previously described (73, 74). Further details are in the  
125 Supplemental Methods. Briefly, rats were euthanized by CO<sub>2</sub> asphyxiation and  
126 DRGs were collected, trimmed, and then transferred into collagenase solution (1  
127 mg/ml) for incubation at 37°C for 1 hr. The digested DRGs were rinsed with  
128 growth medium, centrifuged and dissociated by mechanical agitation. The cells  
129 (~30,000/ well) were plated into each well of 12-well culture plates precoated with  
130 poly-D-lysine and laminin. Cells were maintained in F-12 media supplemented  
131 with 10% horse serum, 2 mM glutamine, 100 μg/ml Normocin, 50 μg/ml penicillin,  
132 50 μg/ml streptomycin, 50 μM 5-fluoro-2'-deoxyuridine, 150 μM uridine, and 30  
133 ng/ml of NGF in 3% CO<sub>2</sub> at 37°C. Growth medium was changed every other day.

134 **Overexpression of Syntaxin 1A**

135 A lentiviral construct containing (1) the CMV promoter, human *STX1A* (NCBI  
136 accession BC064644), IRES, and enhanced green fluorescent protein (EGFP);  
137 or (2) CMV, IRES, and EGFP were used to enhance *STX1A* protein expression  
138 in neuronal cell cultures, as previously described (74). On day 5 in culture,  
139 increasing amounts (1-50ul; ~1 x 10<sup>5</sup> to 5 x 10<sup>6</sup> transducing units) of the lentivirus  
140 was added to the growth media. Two days later, the virus was removed, and the  
141 cells were grown for an additional 5 days in normal growth media.

142 **Immunoblotting**

143 Tissues or cells were harvested, lysed in RIPA buffer (Santa Cruz Biotechnology;  
144 Dallas, TX), sonicated, and cleared of cellular debris by centrifuging at 4000  
145 RPM for 2 minutes. The protein concentration in lysates was quantified using  
146 Lowry assay. Protein aliquots were electrophoresed in a 12% SDS-  
147 polyacrylamide gel, transferred to a PVDF membrane, Further details are in the  
148 Supplemental Methods. and blocked with Tris-buffered saline containing 0.1%  
149 Tween-20 (TBST) and 5% nonfat dry milk for 1 h at room temperature under

150 gentle agitation. Mouse monoclonal antihuman syntaxin 1 antibody  
151 (ThermoFisher MA5-17612, 1:1000) and mouse monoclonal anti-vinculin  
152 antibody (Millipore Sigma V4505, 1:1000) were added to the blocking solution  
153 and incubated for 2 h at room temperature with gentle agitation. Antibody binding  
154 was detected following appropriate secondary antibody methods using  
155 chemiluminescence. The density of the bands was measured using Quantity One  
156 software from Bio-Rad (Hercules, CA) and data were expressed as density of  
157 STX1 normalized to vinculin.

### 158 ***Measurement of calcitonin gene-related peptide release***

159 To assess capsaicin-stimulated release from neuronal cultures with varying  
160 amounts of STX1A overexpression, the cultures were washed once with HEPES  
161 buffer consisting of (in mM) 25 HEPES, 135 NaCl, 3.5 KCl, 2.5 CaCl<sub>2</sub>, 1 MgCl<sub>2</sub>,  
162 3.3 D-glucose, and 0.1% bovine serum albumin, pH 7.4 and maintained at 37°C.  
163 Cultures were then incubated for successive 10-min intervals with 0.4 ml of  
164 HEPES buffer alone (to assess basal release), with buffer containing 30 nM  
165 capsaicin (to assess stimulated release), then with buffer alone (to assess return  
166 to basal release). After each incubation, the buffer was removed and  
167 immunoreactive calcitonin gene-related peptide (CGRP) in each sample was  
168 measured by radioimmunoassay using CGRP antibody generated by Michael J.  
169 Iadarola (National Institutes of Health, Bethesda, MD)(31) as previously  
170 described (74). After the release experiment, the cells in each well were lysed in  
171 0.4 ml of 0.1 M HCl for 20 min and an aliquot was taken to measure total CGRP  
172 content in each well. Total content (fmol/well) was calculated by adding the total  
173 amount of CGRP released in all incubations to the total amount of CGRP  
174 measured from the lysed cells. The release data is calculated as fmol  
175 released/well/10 min and expressed as the % of CGRP release.

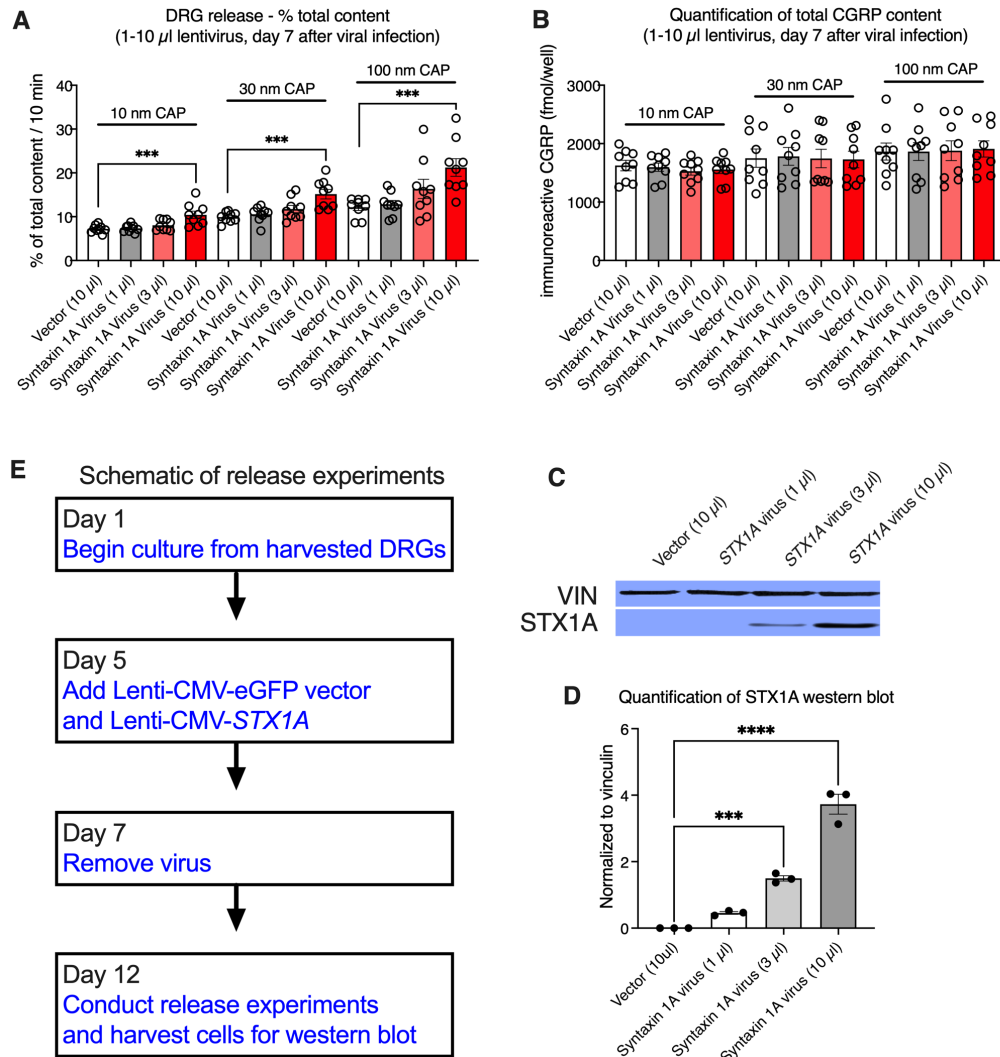

176

177 **Supplemental Figure 1. Effect of expressing lower amounts of *STX1A* on**  
 178 **capsaicin-induced CGRP release from rat primary DGR neuronal culture.**

179 (A) CGRP release was evoked with three different concentrations of capsaicin  
 180 (10, 30 and 100 nmolar) and interacted with three amounts of lentiviral vector. 1  
 181  $\mu$ l of virus =  $1 \times 10^5$  transducing units. Vector expressing eGFP alone was used  
 182 as the control. (A) For each dose of capsaicin, one-way ANOVA was performed  
 183 followed by Dunnett's post hoc testing for each condition vs. the vector control.  
 184 Significant enhancement of release was observed with 10  $\mu$ l virus at each of the  
 185 3 concentrations of capsaicin. (B) Exposure to virus did not affect the primary rat  
 186 DRG cultures. No alteration of CGRP in the cells on the culture plates occurred.  
 187 Loss of cells would have been manifested as a decrease in total content. (C,D)  
 188 Western blot analysis *STX1A* content. (C) Photograph of the western blot. Note  
 189 that the basal amount of *STX1A* protein in the cultures is low. (D) Ascending  
 190 amounts of vector produce significant, progressive increases in *STX1A*  
 191 immunoreactive protein. Higher amounts of vector inhibit CGRP release (see

192 Figure 5). (E) Schematic of culture time course, viral exposure and capsaicin-  
193 induced release.

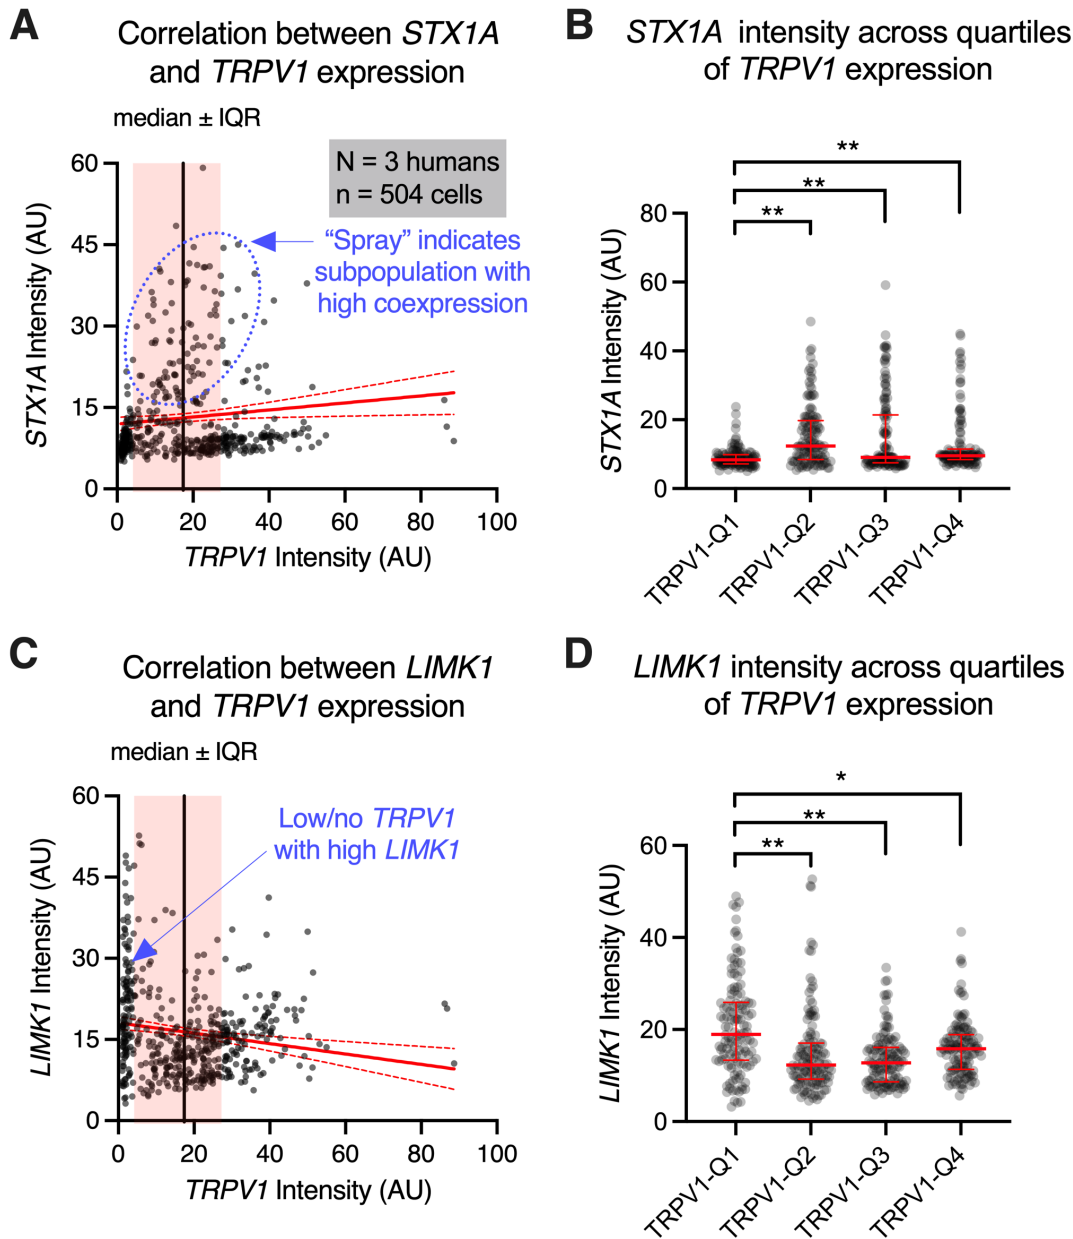

194

195 **Supplemental Figure 2. Signal intensity and colocalization of *STX1A* and**  
196 ***LIMK1* with *TRPV1* in the human DRG.** Binary (yes/no) cell counting showed  
197 that *LIMK1* was ubiquitous in the human DRG. However, variation in level of  
198 expression of this gene was observed. **A, C.** To quantify the relationships  
199 between *STX1A*, *LIMK1* and *TRPV1* expression, correlation plots were  
200 generated. These plots suggested a subpopulation of highly expressing *TRPV1*+  
201 neurons that also expressed high *STX1A* (blue oval in panel A). Cells were  
202 divided into quartiles of *TRPV1* expression by measuring puncta intensity in  
203 ImageJ. This analysis suggests that the cells expressing the least *TRPV1* have



204 less *STX1A* than other cell populations, indicating that there may be  
205 subpopulations in which these two genes are correlated. **C, D.** Conversely,  
206 *LIMK1* appeared to be highest in cells with low or no *TRPV1*. **B, D.** Kruskal-  
207 Wallis test, Prism Graphpad 9; \*,  $p < 0.05$ ; \*\*,  $p < 0.01$ .
